# Supplementary material for: Activated dendritic cells and monocytes in HIV immunological nonresponders: HIV-induced interferon-inducible protein-10 correlates with low future CD4+ recovery
Source: PubMed Central journal article supplement — AIDS. 2019 Feb 14;33(7):1117–29. doi: 10.1097/QAD.0000000000002173 (PMC6511429; doi:10.1097/qad.0000000000002173), 2019-02-14
Supplement: aids-33-1117-s001.pdf [file aids-33-1117-s001.pdf]

## Supplementary methods

### Soluble markers and T cell phenotypes

EDTA plasma and peripheral blood mononuclear cells (PBMC) were sampled at inclusion. Soluble markers of inflammation were analyzed in snap-frozen plasma by ELISA (IP-10, sCD14 and hsIL-6) and multiplex (IL-1 $\beta$ , IL-6, IL-7, IL-10, IL-22, Macrophage Chemoattractant Protein 1, MIP-1 $\beta$  and TNF), and LPS by Limulus Amebocyte Lysate colorimetric assay [1]. Plasma concentrations of tryptophan, kynurenine and neopterin were investigated by liquid chromatography-tandem mass spectrometry [2]. Cryopreserved PBMC were analyzed by 8-color flow cytometry and the fractions of the following CD4<sup>+</sup> and CD8<sup>+</sup> T cell subsets were determined; activated (CD38<sup>+</sup>HLA-DR<sup>+</sup>) and differentiated (naïve; CD45RA<sup>+</sup>CD27<sup>+</sup>, effector memory (EM); CD45RO<sup>+</sup>CD27<sup>+</sup>), and activated and resting regulatory T cells [aTregs; %CD147<sup>high</sup>CD25<sup>high</sup> of CD4<sup>+</sup> [3] and rTregs; %CD45RA<sup>+</sup>Foxp3<sup>+</sup> of CD4<sup>+</sup> (both gated from lymphocytes, singlets, CD3<sup>+</sup>CD4<sup>+</sup> and then the respective Treg subset markers [4])]. More details and plots illustrating the gating strategy can be found in [4].

### References

1. Troseid M, Nowak P, Nystrom J, Lindkvist A, Abdurahman S, Sonnerborg, A. **Elevated plasma levels of lipopolysaccharide and high mobility group box-1 protein are associated with high viral load in HIV-1 infection: reduction by 2-year antiretroviral therapy.** *AIDS*. 2010; **24**:1733-1737.
2. Midttun O, Hustad S, Ueland PM. **Quantitative profiling of biomarkers related to B-vitamin status, tryptophan metabolism and inflammation in human plasma by liquid chromatography/tandem mass spectrometry.** *Rapid Commun Mass Spectrom*. 2009; **23**:1371-1379.
3. Solstad T, Bains SJ, Landskron J, Aandahl EM, Thiede B, Tasken K, *et al.* **CD147 (Basigin/Emmprin) identifies FoxP3<sup>+</sup>CD45RO<sup>+</sup>CTLA4<sup>+</sup>-activated human regulatory T cells.** *Blood* 2011; **118**:5141-5151.
4. Stiksrud B, Lorvik KB, Kvale D, Mollnes TE, Ueland PM, Troseid M, *et al.* **Plasma IP-10 is increased in immunological nonresponders and associated with activated regulatory T cells and persisting low CD4 counts.** *J Acquir Immune Defic Syndr* 2016; **73**:138-148.

# Figure S1

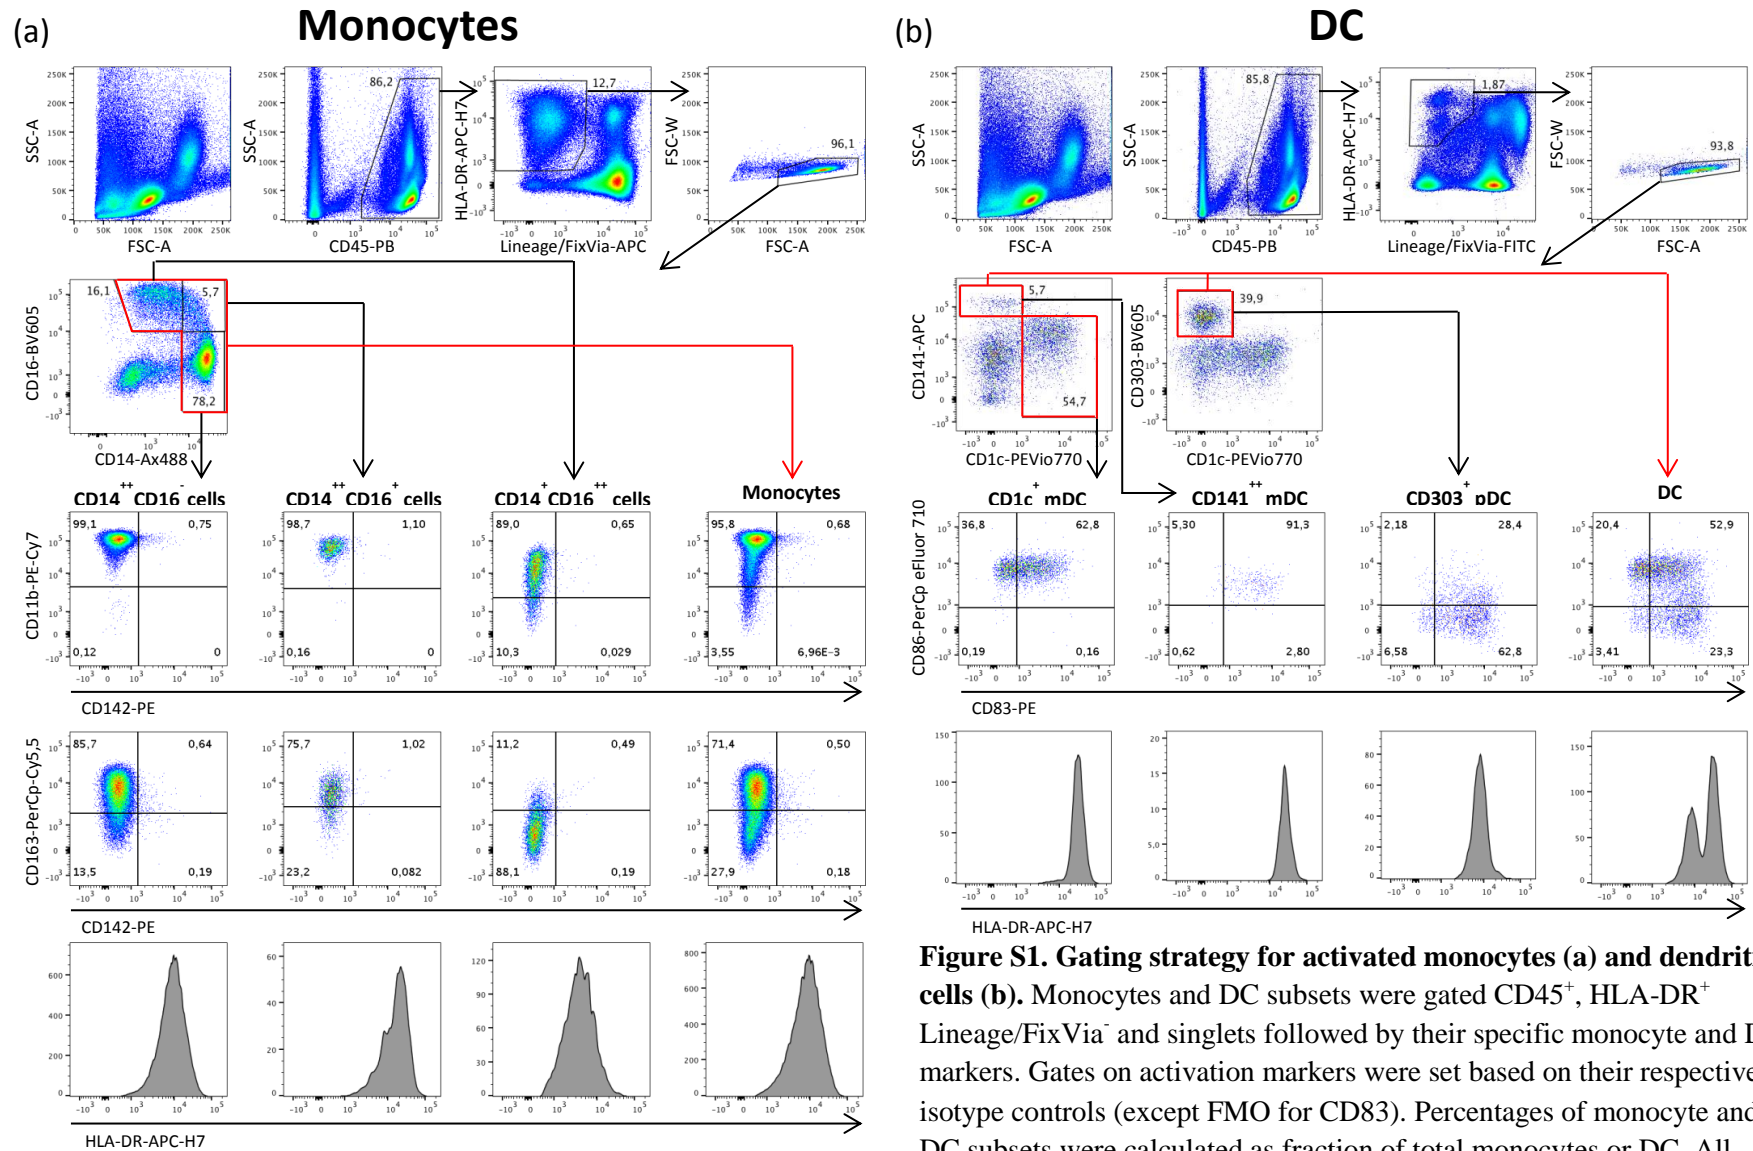

**Figure S1. Gating strategy for activated monocytes (a) and dendritic cells (b).** Monocytes and DC subsets were gated CD45<sup>+</sup>, HLA-DR<sup>+</sup> Lineage/FixVia<sup>-</sup> and singlets followed by their specific monocyte and DC markers. Gates on activation markers were set based on their respective isotype controls (except FMO for CD83). Percentages of monocyte and DC subsets were calculated as fraction of total monocytes or DC. All figures are from one representative HIV immunological non-responder patient. DC, dendritic cells. Lineage, monocyte panel: anti-CD3, CD19, CD20, CD56. Lineage, DC panel; anti-CD3, CD14, CD19, CD20. FixVia, fixable viability stain.

# Figure S2

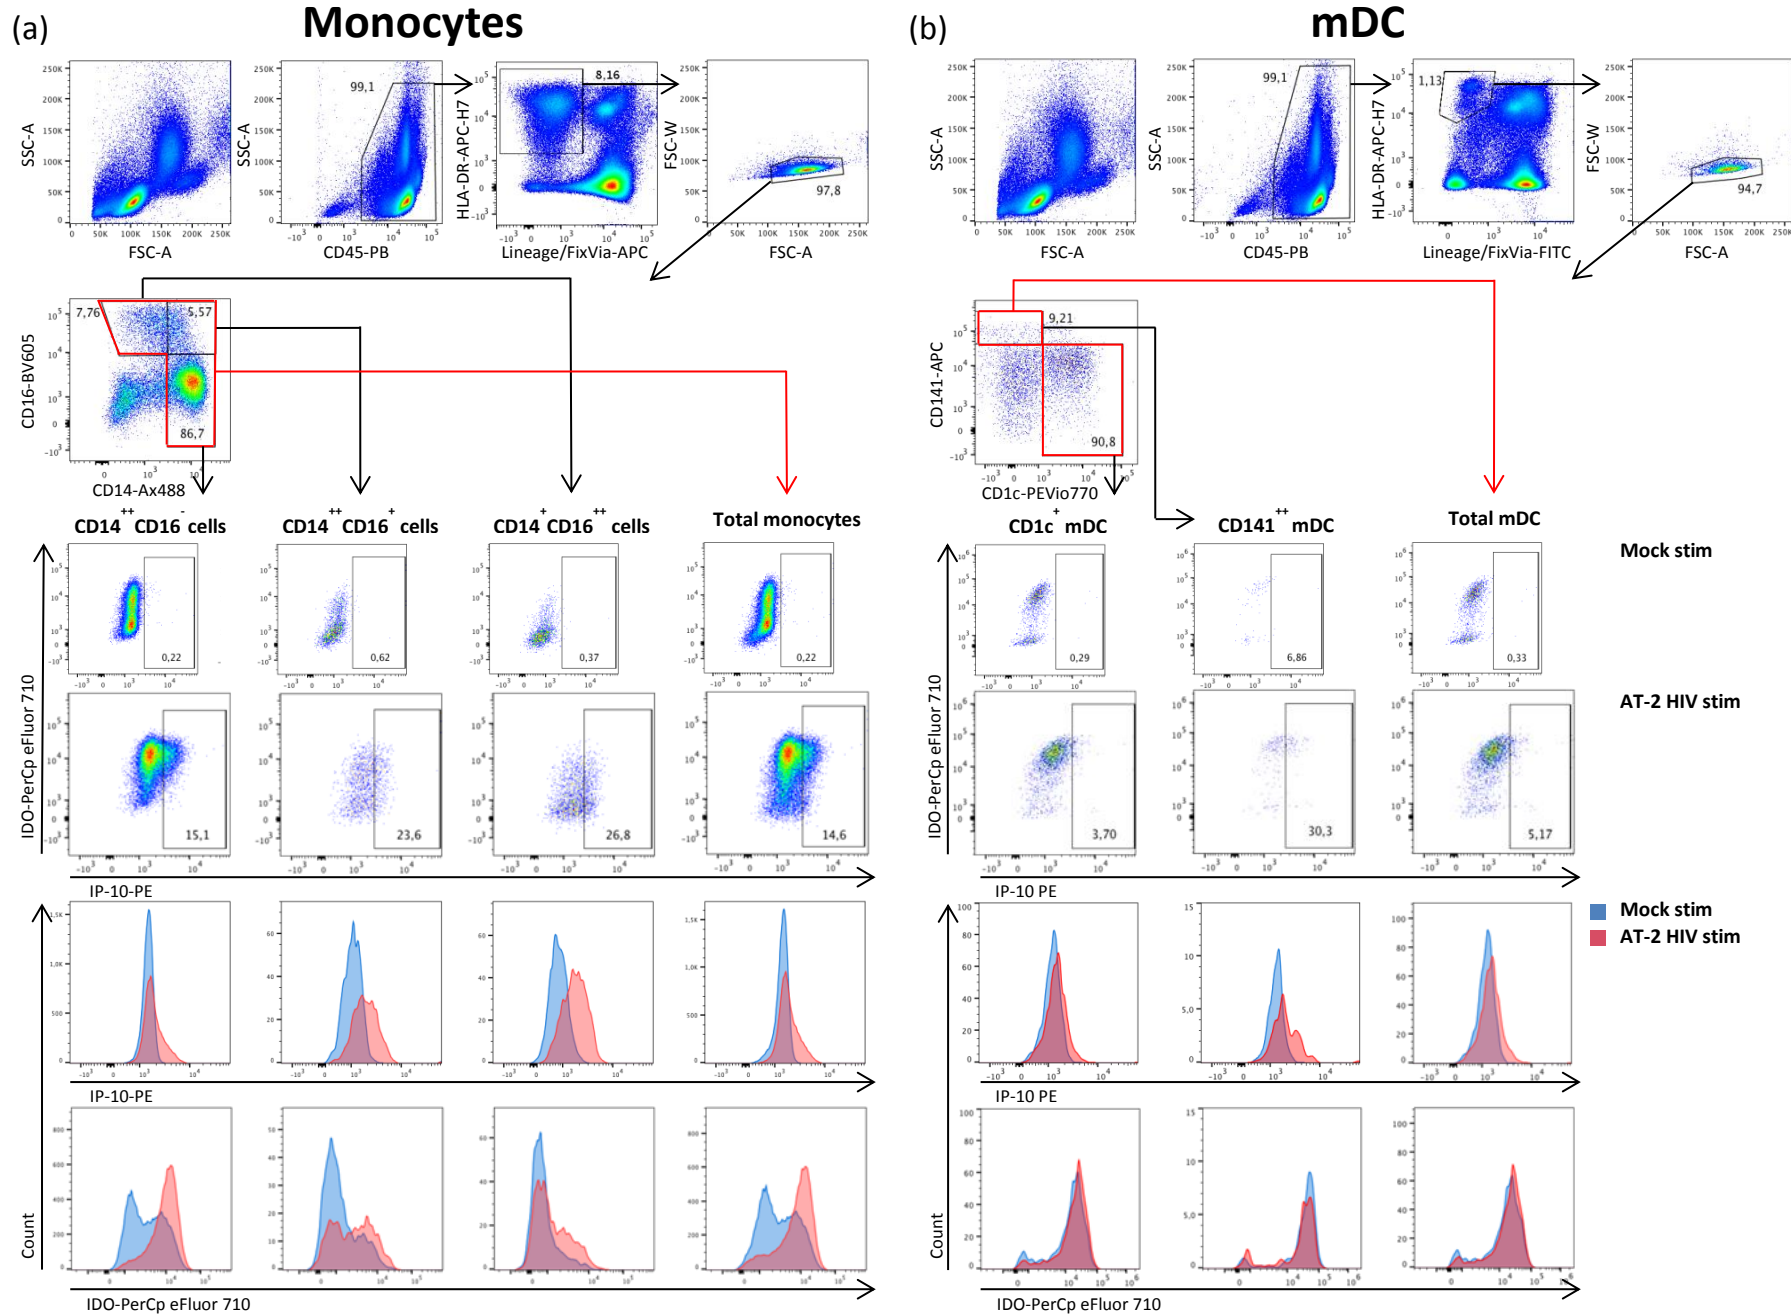

**Figure S2. Gating strategy for IP-10 and IDO expression in monocytes (a) and mDC (b) after exposure to mock and AT-2 HIV *in vitro*.** Monocytes and mDC subsets were gated from CD45<sup>+</sup>, HLA-DR<sup>+</sup> Lineage/FixVia<sup>-</sup> and singlets followed by IP-10 and IDO expression. Due to reduction of the CD303 expression in this assay, IP-10 and IDO upregulation were not analyzed in pDC. Gates on IP-10 and IDO were based on mock stimulated sample as negative control. Percentages of monocyte and mDC subsets were calculated as fraction of total monocytes or mDC. The histograms display overlay plot of mock and AT-2 HIV stimulated samples for IP-10 and IDO, respectively. All figures are from one representative HIV immunological non-responder patient. mDC, myeloid dendritic cells; AT-2 HIV, aldrithiol-2 inactivated HIV-1. Lineage, monocyte panel: anti-CD3, CD19, CD20, CD56. Lineage, DC panel; anti-CD3, CD14, CD19, CD20. FixVia, fixable viability stain.

**Figure S3**

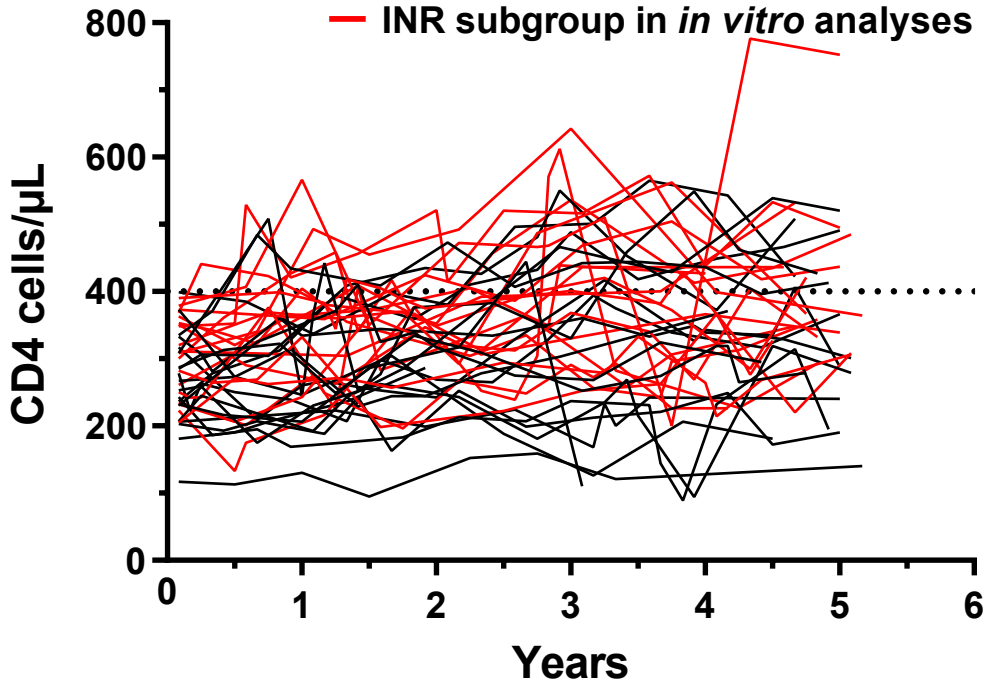

**Figure S3. Line-plots showing CD4 counts in INR from inclusion and median 4.7 years prospectively.**

Line-plots showing CD4 counts in the INR cohort obtained at inclusion and from all routine clinical visits prospectively for median 4.7 years. INR patients included in *in vitro* AT-2 HIV stimulation assays are shown in red. INR, immunological non-responder; AT-2 HIV, aldrithiol-2 inactivated HIV-1 virus.

# Figure S4

## Monocytes

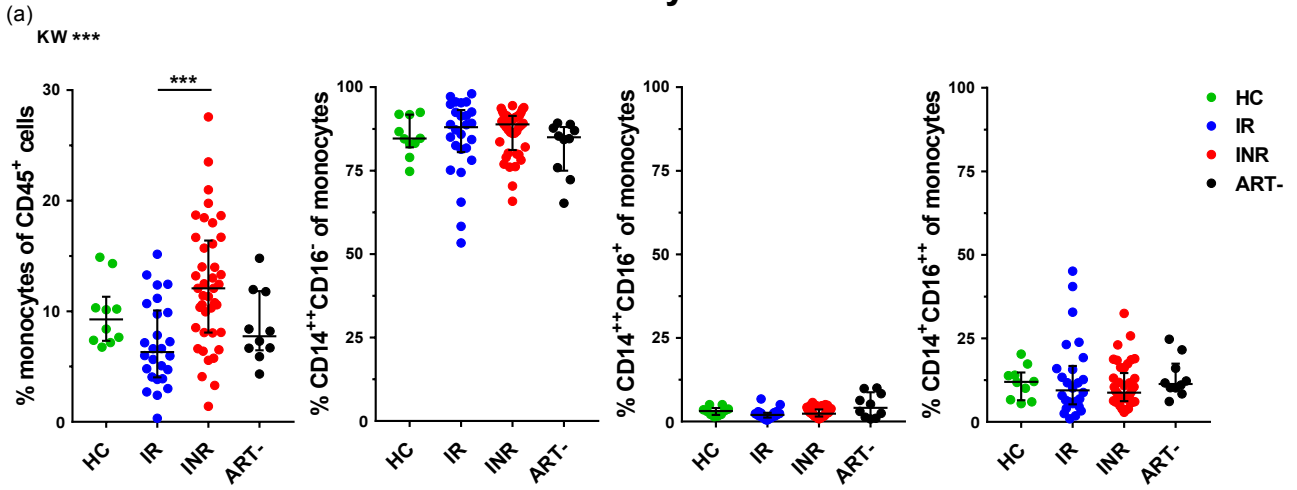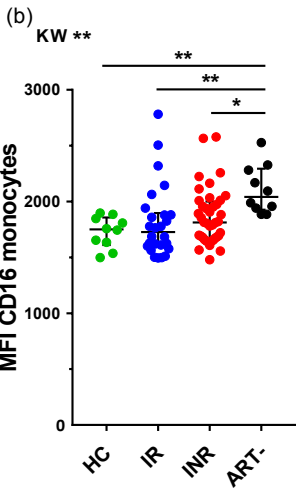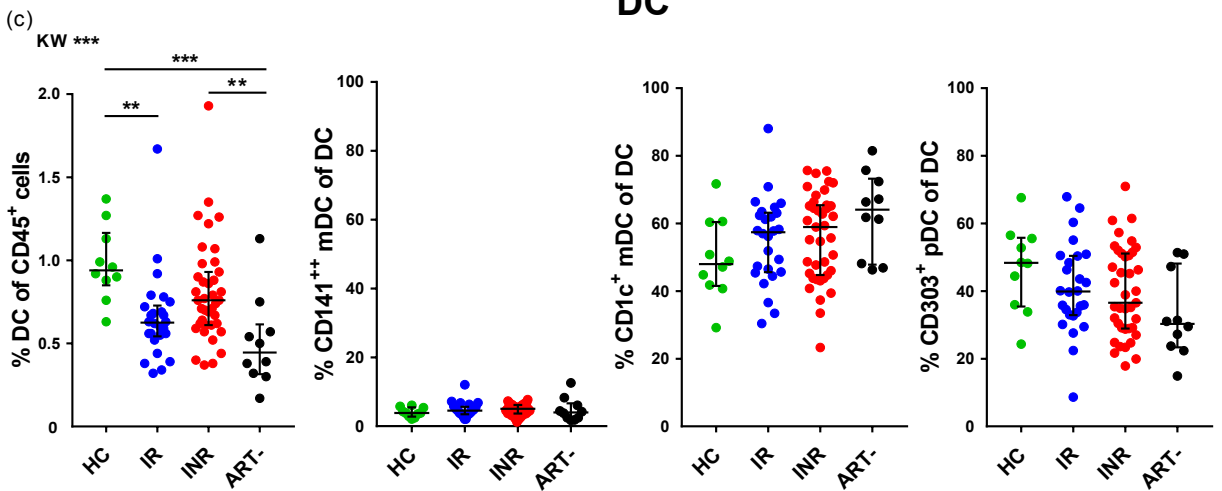

**Figure S4. Distribution of monocytes and dendritic cell subsets in different study groups.** (a) displays percentages of total monocytes of CD45<sup>+</sup> cells and the distribution of specific monocyte subsets in the different study groups and (c) the same for total DC and DC subsets. In (b) MFI values of CD16 in monocytes are shown. Kruskal-Wallis Test (KW) followed by Dunn's posthoc test. \* P < 0.05, \*\* P < 0.01, \*\*\* P < 0.001. Lines indicate median and interquartile range. DC, dendritic cells; MFI, median fluorescence intensity; HC, healthy control; IR, immune responder; INR, immunological non-responder; ART-, antiretroviral therapy naive.

# Figure S5

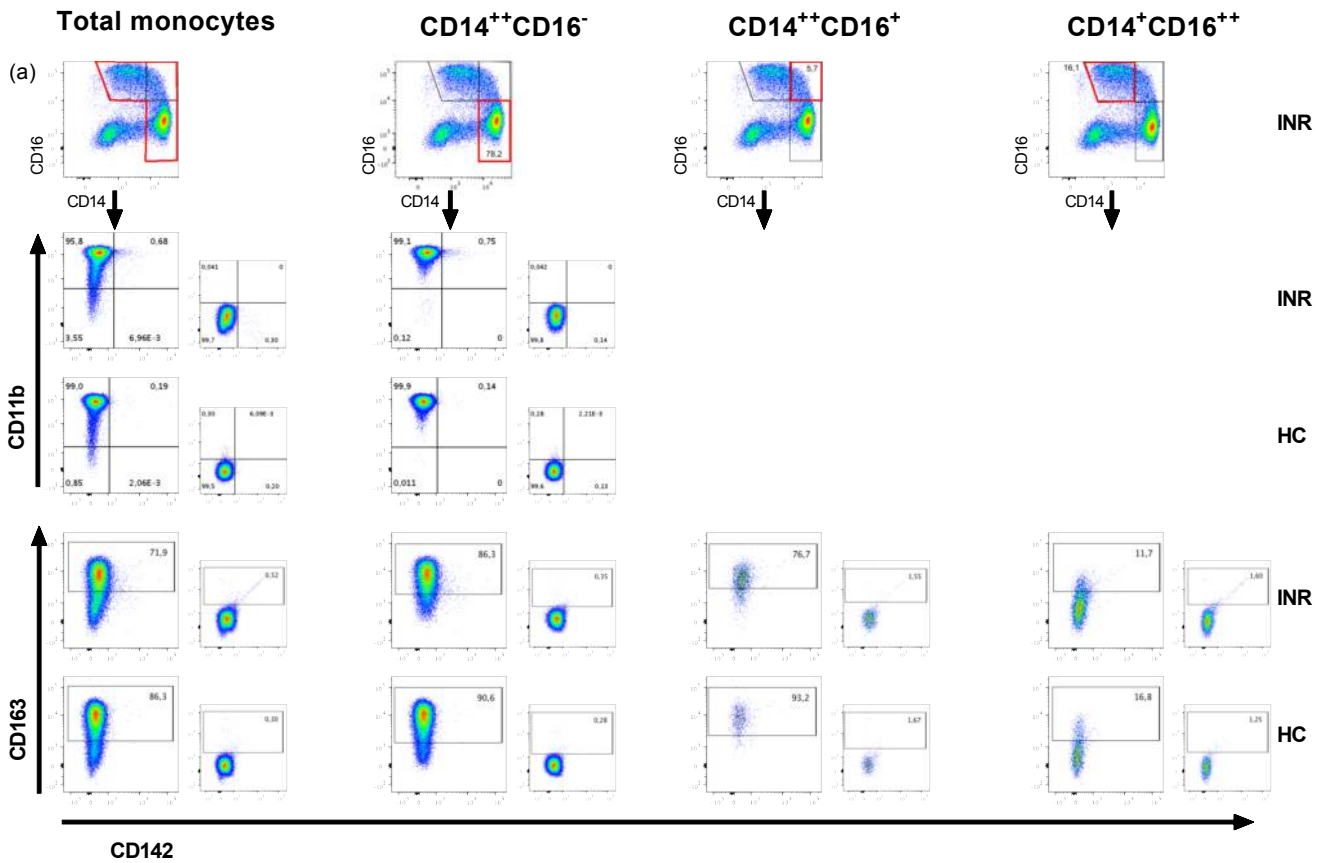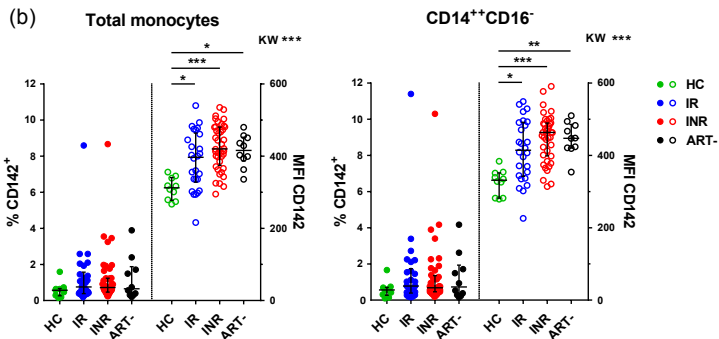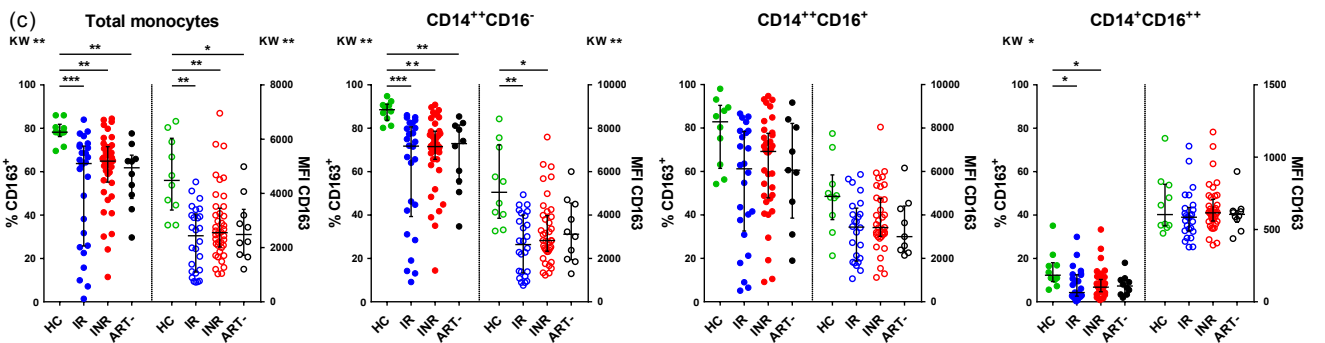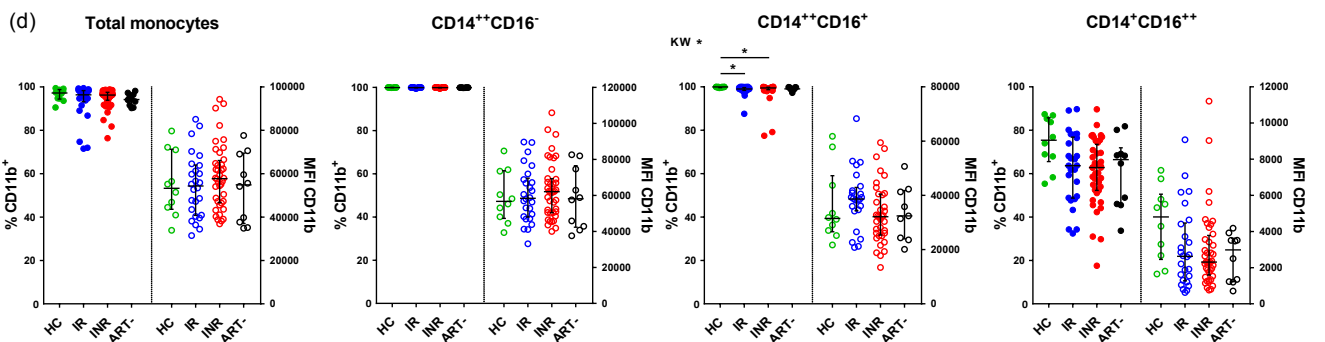

**Figure S5. Monocyte activation markers in the different cohorts.** (a) illustrate gating strategy of monocyte activation markers based on isotype as negative control in total monocytes and different monocyte subsets. The plots show representative examples from one INR and one HC. In (b), (c), and (d) the graphs display both percentages (solid dots) and MFI (open dots) values of the activation markers CD142, CD163 and CD11b in the specific monocyte subsets for each group. Kruskal-Wallis Test (KW) followed by Dunn's posthoc test. \*  $P < 0.05$ , \*\*  $P < 0.01$ , \*\*\*  $P < 0.001$ . Lines indicate median and interquartile range. INR, immunological non-responder; HC, healthy control; IR, immune responder; ART-, antiretroviral therapy naïve HIV-infected; MFI, Median fluorescence intensity.



# Figure S6

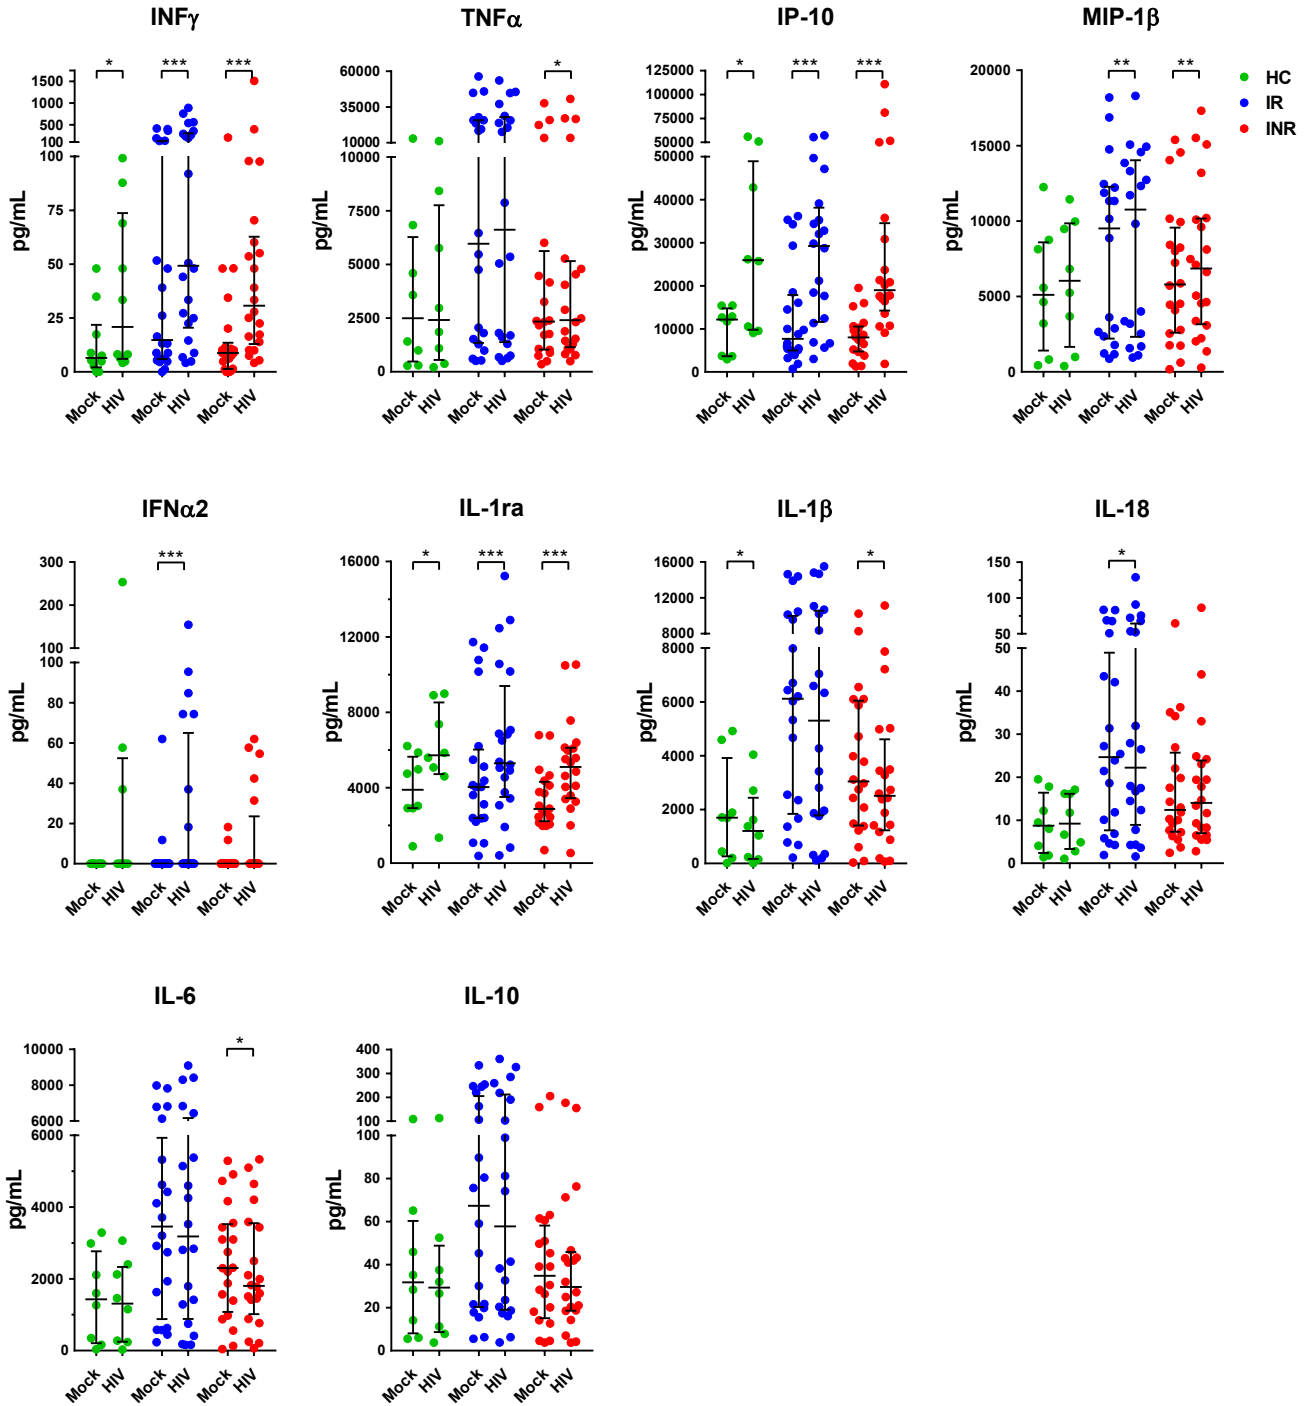

**Figure S6. Cytokine responses in supernatants after exposure to AT-2 HIV *in vitro*.**

This figure shows various cytokine responses in supernatants after *in vitro* stimulation with either mock or AT-2 HIV in the HC, IR and INR subgroups. There were no significant differences in the cytokine responses between the groups (Kruskal-Wallis Test). Wilcoxon Test for pairwise comparisons between mock and AT-2 HIV stimulation. \* P < 0.05, \*\* P < 0.01, \*\*\* P < 0.001. Lines indicate median and interquartile range. AT-2 HIV, aldrithiol-2 inactivated HIV-1 virus; HC, healthy control; IR, immune responder; INR, immunological non-responder.

**TABLE S1. Antibodies and dyes used to determine monocyte and DC frequencies and activation and IP-10 and IDO upregulation after exposure to AT-2 HIV *in vitro***

|                                                   | Fluorochrome | Clone                            | Company                                      | Location                      |
|---------------------------------------------------|--------------|----------------------------------|----------------------------------------------|-------------------------------|
| <b>Monocyte activation</b>                        |              |                                  |                                              |                               |
| CD45                                              | PB           | HI30                             | BioLegend                                    | San Diego, CA, USA            |
| HLA-DR                                            | APC-H7       | G46-6                            | BD Biosciences                               | San Jose, CA, USA             |
| Fixable Viability                                 | eFluor 660   |                                  | eBioscience,<br>Thermo Fischer<br>Scientific | Carlsbad, CA, USA             |
| Lineage, anti CD3,<br>CD19, CD20, CD56            | APC          | UCHT1,<br>HIB19, 2H7,<br>5.1H11  | BioLegend                                    | San Diego, CA, USA            |
| CD16                                              | BV605        | 3G8                              | BD Biosciences                               | San Jose, CA, USA             |
| CD14                                              | Ax488        | M5E2                             | BD Biosciences                               | San Jose, CA, USA             |
| CD142                                             | PE           | HTF-1                            | BD Biosciences                               | San Jose, CA, USA             |
| CD11b                                             | PECy-7       | ICRF44                           | BioLegend                                    | San Diego, CA, USA            |
| CD163                                             | PerCp-Cy 5.5 | GHI/61                           | BD Biosciences                               | San Jose, CA, USA             |
| IgG1 $\kappa$ isotype, mouse                      | PE           |                                  | BD Biosciences                               | San Jose, CA, USA             |
| IgG1 $\kappa$ isotype, mouse                      | PECy-7       |                                  | BioLegend                                    | San Diego, CA, USA            |
| IgG1 $\kappa$ isotype, mouse                      | PerCp-Cy 5.5 |                                  | BD Biosciences                               | San Jose, CA, USA             |
| <b>DC activation</b>                              |              |                                  |                                              |                               |
| CD45                                              | PB           | HI30                             | BioLegend                                    | San Diego, CA, USA            |
| HLA-DR                                            | APC-H7       | G46-6                            | BD Biosciences                               | San Jose, CA, USA             |
| Fixable Viability                                 | eFluor 520   |                                  | eBioscience,<br>Thermo Fischer<br>Scientific | Carlsbad, CA, USA             |
| Lineage 3, anti CD3,<br>CD14, CD19, CD20,<br>CD1c | FITC         | SK7, M $\phi$ P9,<br>SJ25C1, L27 | BD Biosciences                               | San Jose, CA, USA             |
|                                                   | PE-Vio770    | AD5-8E7                          | Miltenyi Biotec<br>GmbH                      | Bergisch Gladbach,<br>Germany |
| CD141                                             | APC          | AD5-14H12                        | Miltenyi Biotec<br>GmbH                      | Bergisch Gladbach,<br>Germany |
| CD303                                             | BV605        | 201A                             | BioLegend                                    | San Diego, CA, USA            |
| CD83                                              | PE           | HB15e                            | BioLegend                                    | San Diego, CA, USA            |

|                               |                     |       |                                              |                               |
|-------------------------------|---------------------|-------|----------------------------------------------|-------------------------------|
| CD86                          | PerCp eFluor<br>710 | IT2.2 | eBioscience,<br>Thermo Fischer<br>Scientific | Carlsbad, CA, USA             |
| IgG2b $\kappa$ isotype, mouse | PerCp eFluor<br>710 |       | eBioscience,<br>Thermo Fischer<br>Scientific | Carlsbad, CA, USA             |
| Tandem Signal<br>Enhancer     |                     |       | Miltenyi Biotec<br>GmbH                      | Bergisch Gladbach,<br>Germany |

---

**IDO and IP-10 upregulation in monocytes after exposure to AT-2 HIV *in vitro***

|                                        |                     |                                 |                                              |                    |
|----------------------------------------|---------------------|---------------------------------|----------------------------------------------|--------------------|
| CD45                                   | PB                  | HI30                            | BioLegend                                    | San Diego, CA, USA |
| HLA-DR                                 | APC-H7              | G46-6                           | BD Biosciences                               | San Jose, CA, USA  |
| Fixable Viability                      | eFluor 660          |                                 | eBioscience,<br>Thermo Fischer<br>Scientific | Carlsbad, CA, USA  |
| Lineage, anti CD3,<br>CD19, CD20, CD56 | APC                 | UCHT1,<br>HIB19, 2H7,<br>5.1H11 | BioLegend                                    | San Diego, CA, USA |
| CD16                                   | BV605               | 3G8                             | BioLegend                                    | San Diego, CA, USA |
| CD14                                   | Ax488               | M5E2                            | BD Biosciences                               | San Jose, CA, USA  |
| IP-10                                  | PE                  | 6D4/D6/G2                       | BD Biosciences                               | San Jose, CA, USA  |
| IDO                                    | PerCp-eFluor<br>710 | eyedio                          | eBioscience,<br>Thermo Fischer<br>Scientific | Carlsbad, CA, USA  |

---

**IDO and IP-10 upregulation in DC after exposure to AT-2 HIV *in vitro***

|                                                   |            |                                  |                                              |                               |
|---------------------------------------------------|------------|----------------------------------|----------------------------------------------|-------------------------------|
| CD45                                              | PB         | HI30                             | BioLegend                                    | San Diego, CA, USA            |
| HLA-DR                                            | APC-H7     | G46-6                            | BD Biosciences                               | San Jose, CA, USA             |
| Fixable Viability                                 | eFluor 520 |                                  | eBioscience,<br>Thermo Fischer<br>Scientific | Carlsbad, CA, USA             |
| Lineage 3, anti CD3,<br>CD14, CD19, CD20,<br>CD1c | FITC       | SK7, M $\phi$ P9,<br>SJ25C1, L27 | BD Biosciences                               | San Jose, CA, USA             |
|                                                   | PE-Vio770  | AD5-8E7                          | Miltenyi Biotec<br>GmbH                      | Bergisch Gladbach,<br>Germany |
| CD141                                             | APC        | AD5-14H12                        | Miltenyi Biotec<br>GmbH                      | Bergisch Gladbach,<br>Germany |
| CD303                                             | BV605      | 201A                             | BioLegend                                    | San Diego, CA, USA            |

|                           |                     |           |                                              |                               |
|---------------------------|---------------------|-----------|----------------------------------------------|-------------------------------|
| IP-10                     | PE                  | 6D4/D6/G2 | BD Biosciences                               | San Jose, CA, USA             |
| IDO                       | PerCp-eFluor<br>710 | eyedio    | eBioscience,<br>Thermo Fischer<br>Scientific | Carlsbad, CA, USA             |
| Tandem Signal<br>Enhancer |                     |           | Miltenyi Biotec<br>GmbH                      | Bergisch Gladbach,<br>Germany |

---

DC, dendritic cells; AT-2 HIV, aldrithiol-2 inactivated HIV-1

---

**TABLE S2. Characteristics of the Subgroups for *in vitro* AT-2 HIV stimulation at Inclusion**

| <b>Total study population</b>        | <b>INR (n=20)</b>   | <b>IR (n=20)</b>      | <b>HC (n=8)</b>  | <b>P-value<sup>a</sup></b> |
|--------------------------------------|---------------------|-----------------------|------------------|----------------------------|
| Age, (IQR)                           | 47.4 (41.0-56.5)    | 45 (40.2-55.3)        | 46.4 (40.4-57.3) | NS                         |
| Male gender, n (%)                   | 18 (90)             | 15 (75)               | 6 (75)           | NS                         |
| <b>Ethnicity, n (%)</b>              |                     |                       |                  |                            |
| Caucasian                            | 14 (70)             | 13 (65)               | 8 (100)          | NS                         |
| <b>Risk group, n (%)</b>             |                     |                       |                  |                            |
| MSM                                  | 9 (45)              | 10 (50)               |                  | NS                         |
| Other <sup>1</sup>                   | 11 (55)             | 10 (50)               |                  | NS                         |
| <b>Comorbid diseases, n (%)</b>      |                     |                       |                  |                            |
| Cardiovascular                       | 2 (10)              | 0 (0)                 |                  | NS                         |
| Any comorbidity <sup>2</sup>         | 9 (45)              | 5 (25)                |                  | NS                         |
| CMV IgG pos                          | 20 (100)            | 20 (100)              |                  | NS                         |
| <b>HIV characteristics, (IQR)</b>    |                     |                       |                  |                            |
| Years since HIV diagnosis            | 8.1 (5.4-13.5)      | 9.5 (7.5-14.3)        |                  | NS                         |
| Years of continuous ART              | 5.5 (3.5-6.1)       | 6.7 (5.9-8.6)         |                  | <b>0.01</b>                |
| Viral load at ART initiation, cop/mL | 41000 (25600-71000) | 160000 (65400-460000) |                  | <b>0.02</b>                |
| Duration of viral suppression, years | 3.8 (2.6-5.5)       | 6.2 (4.4-7.6)         |                  | <b>0.01</b>                |
| Viral load at inclusion, cop/mL      | ≤20                 | ≤20                   |                  | NS                         |
| CD4 count nadir, cells/μL            | 151.5 (95-165)      | 148.5 (94-190)        |                  | NS                         |
| CD4 count at inclusion, cells/μL     | 309.5 (242.5-358)   | 795.5 (732-847.5)     |                  | <b>&lt;0.001</b>           |
| CD8 count at inclusion, cells/μL     | 665.5 (544-921)     | 989.5 (796-1575.5)    |                  | <b>0.002</b>               |
| CD4/CD8 at inclusion                 | 0.44 (0.35-0.55)    | 0.79 (0.55-0.99)      |                  | <b>&lt;0.001</b>           |

---

Data are presented as no. (%) of study participants or median (interquartile range (IQR)) values.

<sup>a</sup>P-values for Kruskal-Wallis Test or Pearson Chi-Square test for comparison between multiple groups, Mann-Whitney U Test or Fischer's Exact Test for comparison INR vs IR.

<sup>1</sup>Other. Heterosexual or unknown. There were no intravenous drug abusers.

<sup>2</sup>One or more of the following comorbidities; cardiovascular disease, hypertension, diabetes, renal disease, osteoporosis, chronic obstructive pulmonary disease, neurodegenerative disease, previous cancer or Mycobacterium tuberculosis infection.

AT-2 HIV, aldrithiol-2 inactivated HIV-1; INR, immunological non-responders; IR, immunological responders; HC, healthy control; MSM, men who have sex with men; CMV, cytomegalovirus; ART, antiretroviral therapy.

---

**TABLE S3. INR group (n=38): Correlation between HIV baseline characteristics and CD4 count and CD4/CD8 after four years and the increase in CD4 and CD4/CD8 from inclusion**

|                                                 | <b>CD4<br/>(cells/<math>\mu</math>L)<br/>(rho)</b> | <b>CD4<br/>increase<br/>(rho)</b> | <b>CD4/CD8<br/>(rho)</b> | <b>CD4/CD8<br/>increase<br/>(rho)</b> |
|-------------------------------------------------|----------------------------------------------------|-----------------------------------|--------------------------|---------------------------------------|
| <b>Duration of continuous ART</b>               | <b>-0.40*</b>                                      | <b>-0.55***</b>                   | <b>-0.63***</b>          | <b>-0.47**</b>                        |
| <b>Duration of continuous viral suppression</b> | -0.26                                              | <b>-0.37*</b>                     | <b>-0.48**</b>           | <b>-0.42*</b>                         |
| <b>Duration of HIV infection</b>                | <b>-0.33*</b>                                      | <b>-0.33*</b>                     | <b>-0.46**</b>           | <b>-0.35*</b>                         |
| <b>Nadir CD4</b>                                | <b>0.46**</b>                                      | <b>0.35*</b>                      | -0.31                    | 0.15                                  |
| <b>Age</b>                                      | <b>-0.38*</b>                                      | -0.32                             | <b>-0.37*</b>            | -0.25                                 |

Spearman rank order correlation. \* P < 0.05, \*\* P < 0.01, \*\*\* P < 0.001

INR, immunological non-responder; ART, antiretroviral therapy

**TABLE S4. Correlation between expression of activation markers on monocytes or DC subsets and T cell activation and differentiation, aTregs/rTregs, and CD4 count at inclusion, in INR and IR**

| Cell population               |                                          | Act. CD4 <sup>+</sup> T cells (rho) | Act. CD8 <sup>+</sup> T cells (rho) | EM CD4 <sup>+</sup> T cells (rho) | Naïve/EM CD8 <sup>+</sup> T cells (rho) | aTregs/rTregs (rho) | CD4 count (cells/ $\mu$ L) (rho) |
|-------------------------------|------------------------------------------|-------------------------------------|-------------------------------------|-----------------------------------|-----------------------------------------|---------------------|----------------------------------|
| <b>Total monocytes</b>        | <b>MFI HLA-DR</b>                        | <b>0.62**</b>                       | <b>0.48*</b>                        | <b>0.42**</b>                     | <b>-0.37*</b>                           | 0.05                | <b>-0.32**</b>                   |
| <b>CD141<sup>++</sup> mDC</b> | <b>%CD83<sup>+</sup></b>                 | 0.43                                | 0.47                                | 0.18                              | -0.20                                   | 0.16                | <b>-0.42**</b>                   |
|                               | <b>%CD86<sup>+</sup></b>                 | <b>0.57*</b>                        | <b>0.51*</b>                        | 0.30                              | -0.34                                   | <b>0.40*</b>        | <b>-0.54***</b>                  |
|                               | <b>MFI CD86</b>                          | 0.38                                | 0.12                                | 0.20                              | -0.18                                   | 0.31                | <b>-0.45***</b>                  |
|                               | <b>%CD83<sup>+</sup>CD86<sup>+</sup></b> | 0.43                                | <b>0.51*</b>                        | 0.20                              | -0.28                                   | 0.25                | <b>-0.49***</b>                  |
| <b>CD1c<sup>+</sup> mDC</b>   | <b>MFI HLA-DR</b>                        | <b>0.62**</b>                       | 0.38                                | <b>0.33*</b>                      | <b>-0.33*</b>                           | 0.09                | <b>-0.36**</b>                   |
|                               | <b>MFI CD86</b>                          | <b>0.44*</b>                        | 0.27                                | 0.27                              | -0.23                                   | <b>0.31*</b>        | <b>-0.56***</b>                  |
| <b>CD303<sup>+</sup> pDC</b>  | <b>%CD83<sup>+</sup></b>                 | <b>0.60**</b>                       | <b>0.47*</b>                        | 0.19                              | -0.28                                   | <b>0.31*</b>        | <b>-0.43**</b>                   |
|                               | <b>MFI CD83</b>                          | <b>0.65**</b>                       | <b>0.52*</b>                        | 0.18                              | -0.24                                   | <b>0.40**</b>       | <b>-0.37**</b>                   |

Spearman rank order correlation. \* P < 0.05, \*\* P < 0.01, \*\*\* P < 0.001

DC, dendritic cells; mDC, myeloid dendritic cells; pDC, plasmacytoid dendritic cells; Act, activated cells (CD38<sup>+</sup>HLA-DR<sup>+</sup>); EM, effector memory cells (CD45RO<sup>+</sup>CD27<sup>-</sup>); naïve (CD45RA<sup>+</sup>CD27<sup>+</sup>), aTregs; activated regulatory T cells (%CD147<sup>high</sup>CD25<sup>high</sup> of CD4<sup>+</sup>); rTregs, resting Tregs (%CD45RA<sup>+</sup>Foxp3<sup>+</sup> of CD4<sup>+</sup>); MFI, median fluorescence intensity.



**TABLE S5. Correlation between cytokines responses in supernatants and IP-10 and IDO expression in monocytes and mDC after exposure to AT-2 HIV *in vitro* in INR and IR**

|                                | INR (n=20)            |                     |                     | IR (n=20)             |                       |
|--------------------------------|-----------------------|---------------------|---------------------|-----------------------|-----------------------|
|                                | Monocytes             |                     | mDC                 | mDC                   |                       |
| Supernatants<br>(pg/mL)        | MFI<br>IP-10<br>(rho) | %<br>IP-10<br>(rho) | MFI<br>IDO<br>(rho) | MFI<br>IP-10<br>(rho) | MFI<br>IP-10<br>(rho) |
| <b>MIP-1<math>\beta</math></b> | <b>0.45*</b>          | 0.35                | <b>0.53*</b>        | <b>0.56*</b>          | <b>0.55*</b>          |
| <b>IFN<math>\alpha</math>2</b> | <b>0.63**</b>         | 0.37                | 0.28                | <b>0.58**</b>         | -0.22                 |
| <b>IL-1ra</b>                  | <b>0.59**</b>         | <b>0.45*</b>        | 0.14                | <b>0.65**</b>         | 0.26                  |
| <b>IL-18</b>                   | <b>0.63**</b>         | 0.17                | 0.35                | <b>0.47*</b>          | -0.03                 |
| <b>IL-1<math>\beta</math></b>  | 0.41                  | -0.12               | 0.04                | 0.06                  | -0.11                 |
| <b>IFN<math>\gamma</math></b>  | 0.41                  | 0.15                | 0.43                | <b>0.47*</b>          | -0.04                 |
| <b>TNF<math>\alpha</math></b>  | 0.39                  | 0.14                | 0.31                | 0.42                  | 0.01                  |
| <b>IP-10</b>                   | <b>0.67**</b>         | <b>0.53*</b>        | 0.20                | <b>0.63**</b>         | 0.44                  |
| <b>IL-6</b>                    | 0.30                  | -0.16               | 0.12                | 0.08                  | -0.13                 |

Correlation between delta values (mock stimulation subtracted).

Spearman rank order correlation. \* P < 0.05, \*\* P < 0.01

IDO, indoleamine 2, 3 dioxygenase; mDC, myeloid dendritic cells; AT-2 HIV, aldrithiol-2-inactivated HIV-1; INR, immunological non-responder; IR, immune responder; MFI, median fluorescence intensity.
